# Supplementary material for: Integrated Proteomics to Understand the Role of Neuritin (NRN1) as a Mediator of Cognitive Resilience to Alzheimer’s Disease
Source: PubMed Central journal article supplement (PMC10233303; doi:10.1016/j.mcpro.2023.100542), 2023-04-05

Supplemental Figure 3

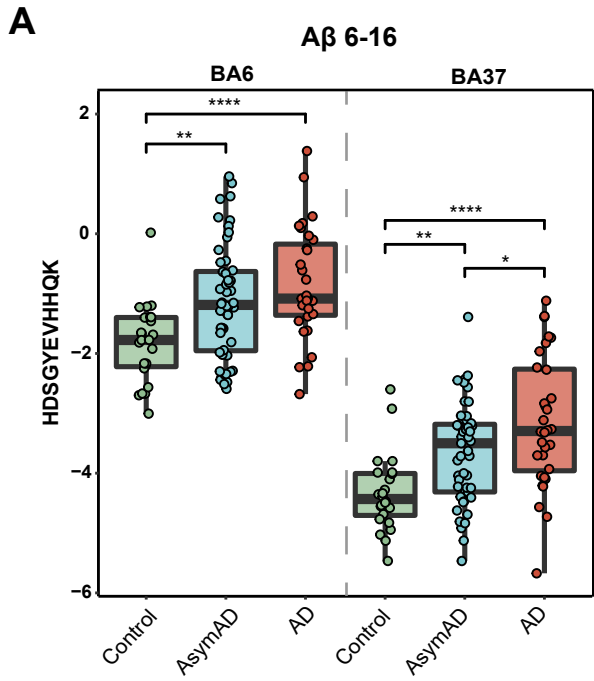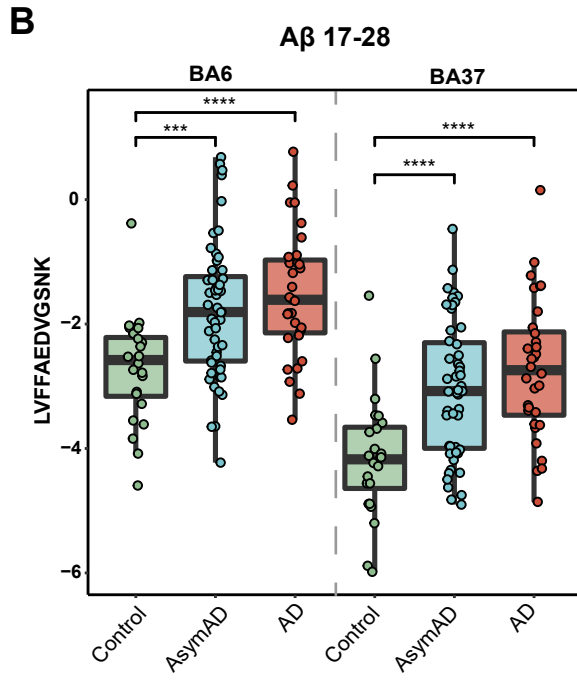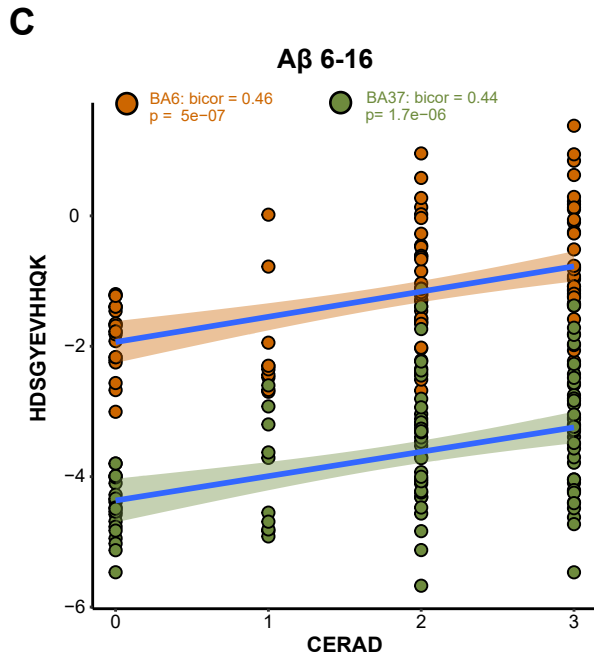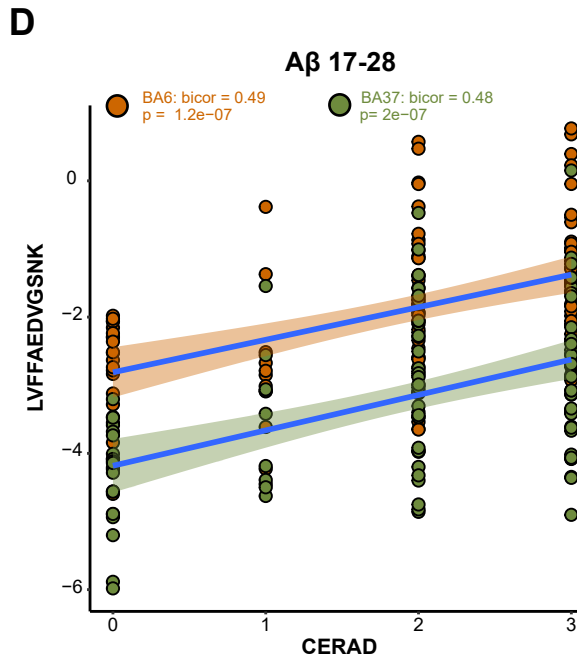

Supplement: mmc3.pdf [file mmc3.pdf]
